# Supplementary material
Source: bioRxiv or medRxiv preprint supplement (https://www.biorxiv.org/highwire/filestream/86441/field_highwire_adjunct_files/2/090795-11.pdf)
Supplement: Supplementary file [file 090795-11.pdf]

# KEGG Pathways

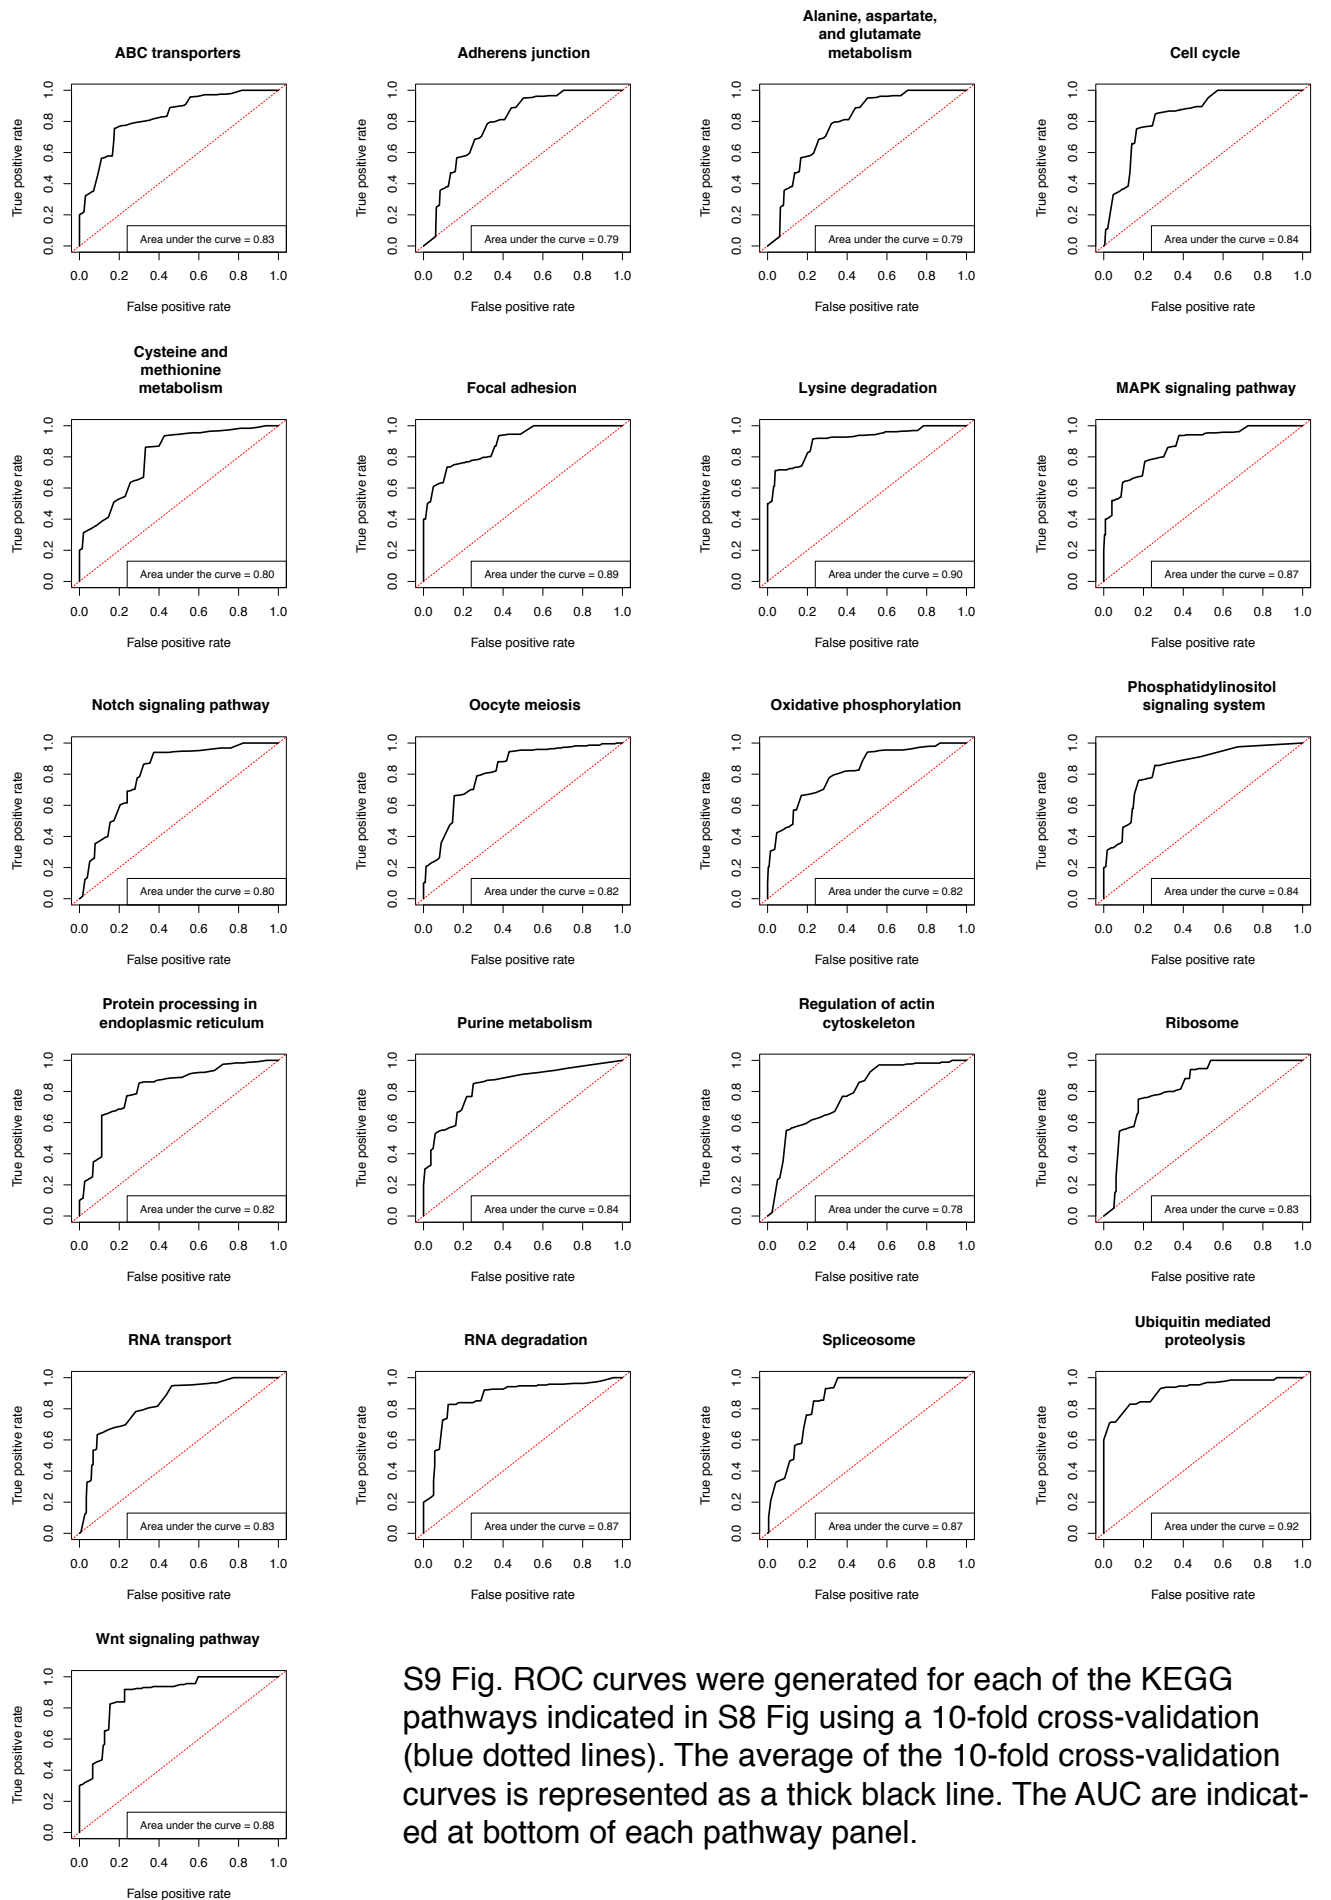

S9 Fig. ROC curves were generated for each of the KEGG pathways indicated in S8 Fig using a 10-fold cross-validation (blue dotted lines). The average of the 10-fold cross-validation curves is represented as a thick black line. The AUC are indicated at bottom of each pathway panel.
